# Supplementary material
Source: PubMed Central journal article supplement (PMC10587830)
Supplement: jamaophthalmol-e234508-s001.pdf [file jamaophthalmol-e234508-s001.pdf]

## Supplementary Online Content

Korot E, Batista Gonçalves M, Huemer J, et al. Clinician-driven AI code-free self-training on public data for diabetic retinopathy referral. *JAMA Ophthalmol*. Published online October 19, 2023. doi:10.1001/jamaophthalmol.2023.4508

### **eTable.** Model Confusion Matrices

This supplementary material has been provided by the authors to give readers additional information about their work.

**eTable.** Model Confusion Matrices

| Model   | Dataset                  | Confusion Matrix |               |               |
|---------|--------------------------|------------------|---------------|---------------|
|         |                          | Model Prediction | True Positive | True Negative |
| Teacher | Messidor<br>(Internal 1) | Positive         | 37            | 5             |
|         |                          | Negative         | 9             | 123           |
|         |                          |                  |               |               |
| Student |                          | Positive         | 39            | 4             |
|         | Negative                 | 7                | 124           |               |
|         |                          |                  |               |               |
| Teacher | EyePACS<br>(Internal 2)  | Positive         | 23            | 26            |
|         |                          | Negative         | 18            | 214           |
|         |                          |                  |               |               |
| Student |                          | Positive         | 39            | 70            |
|         | Negative                 | 2                | 170           |               |
|         |                          |                  |               |               |
| Teacher | Egypt<br>(External)      | Positive         | 187           | 3             |
|         |                          | Negative         | 11            | 9             |
|         |                          |                  |               |               |
| Student |                          | Positive         | 198           | 7             |
|         | Negative                 | 0                | 5             |               |
