# Supplementary material
Source: PubMed Central journal article supplement (PMC10587830)
Supplement: jamaophthalmol-e234508-s002.pdf [file jamaophthalmol-e234508-s002.pdf]

## Data Sharing Statement

Korot. Clinician-Driven AI: Code-Free Self-Training on Public Data for Diabetic Retinopathy Referral. *JAMA Ophthalmol*. Published October 19, 2023.

doi:10.1001/jamaophthalmol.2023.4508

### Data

**Data available:** Yes

**Data types:** Deidentified participant data

**How to access data:** We used these existing public datasets

<https://www.kaggle.com/datasets/mariaherrerot/eyepacspreprocess>

<https://www.adcis.net/en/third-party/messidor/>

**When available:** With publication

### Supporting Documents

**Document types:** None

### Additional Information

**Who can access the data:** Anyone, it is already available, as public datasets.

**Types of analyses:** for any purpose

**Mechanisms of data availability:** already available as public datasets from other parties
